1  
2 **Opportunities and limits of combining microbiome and genome data**  
3 **for complex trait prediction**

4  
5 **Miguel Pérez-Enciso<sup>1,2,4</sup>, Laura M. Zingaretti<sup>2,4</sup>, Yulixaxis Ramayo-Caldas<sup>3</sup>,**  
6 **Gustavo de los Campos<sup>4</sup>**

7  
8 1 ICREA, Passeig de Lluís Companys 23, 08010 Barcelona, Spain

9 2 Centre for Research in Agricultural Genomics (CRAG), CSIC-IRTA-UAB-UB,  
10 08193 Bellaterra, Barcelona, Spain

11 3 Animal Breeding and Genetics Program, Institute for Research and Technology in  
12 Food and Agriculture (IRTA), Torre Marimon, 08140 Caldes de Montbui, Barcelona,  
13 Spain

14 4 Michigan State University, Dept. of Epidemiology & Biostatistics, and Dept. of  
15 Statistics & Probability, East Lansing, MI 48824, USA.

16  
17 Short title:

18 Combining microbiome and genome data for complex trait prediction

19  
20 Correspondence:

21 M. Pérez-Enciso

22 CRAG

23 Campus UAB

24 08193 Bellaterra, Spain

25 [miguel.perez@uab.es](mailto:miguel.perez@uab.es)

26

27

28 **Abstract**

29 The analysis and prediction of complex traits using microbiome data combined with host  
30 genomic information is a topic of utmost interest. However, numerous questions remain  
31 to be answered: How useful can the microbiome be for complex trait prediction? Are  
32 microbiability estimates reliable? Can the underlying biological links between the host's  
33 genome, microbiome, and the phenome be recovered? Here, we address these issues by  
34 (i) developing a novel simulation strategy that uses real microbiome and genotype data  
35 as input, and (ii) proposing a variance-component approach which, in the spirit of  
36 mediation analyses, quantifies the proportion of phenotypic variance explained by  
37 genome and microbiome, and dissects it into direct and indirect effects. The proposed  
38 simulation approach can mimic a genetic link between the microbiome and SNP data via  
39 a permutation procedure that retains the distributional properties of the data. Results  
40 suggest that microbiome data could significantly improve phenotype prediction accuracy,  
41 irrespective of whether some abundances are under direct genetic control by the host or  
42 not. Overall, random-effects linear methods appear robust for variance components  
43 estimation, despite the highly leptokurtic distribution of microbiota abundances.  
44 Nevertheless, we observed that accuracy depends in part on the number of  
45 microorganisms' taxa influencing the trait of interest. While we conclude that overall  
46 genome-microbiome-links can be characterized via variance components, we are less  
47 optimistic about the possibility of identifying the causative effects, i.e., individual SNPs  
48 affecting abundances; power at this level would require much larger sample sizes than  
49 the ones typically available for genome-microbiome-phenome data.

50

51 **Author summary**

52 The microbiome consists of the microorganisms that live in a particular environment,  
53 including those in our organism. There is consistent evidence that these communities play  
54 an important role in numerous traits of relevance, including disease susceptibility or feed  
55 efficiency. Moreover, it has been shown that the microbiome can be relatively stable  
56 throughout an individual's life and that is affected by the host genome. These reasons  
57 have prompted numerous studies to determine whether and how the microbiome can be  
58 used for prediction of complex phenotypes, either using microbiome alone or in  
59 combination with host's genome data. However, numerous questions remain to be  
60 answered such as the reliability of parameter estimates, or which is the underlying  
61 relationship between microbiome, genome, and phenotype. The few available empirical

62 studies do not provide a clear answer to these problems. Here we address these issues by  
63 developing a novel simulation strategy and we show that, although the microbiome can  
64 significantly help in prediction, it will be difficult to retrieve the actual biological basis  
65 of interactions between the microbiome and the trait.

66

## 67 **Introduction**

68 The relevance of microbial ecosystems associated with humans and animals in health and  
69 production is now widely recognized, e.g., [1–5]. To quantify its influence, the fraction  
70 of variance of a given trait explained by the microbiome has been named ‘microbiability’  
71 ( $b^2$ ) [6], in symmetry with the classical ‘heritability’ ( $h^2$ ) concept [7]. Previously, the term  
72 "hologenome" had been coined to describe the joint action of genome and microbiome in  
73 explaining an observed phenotype [8].

74

75 A consequence of microbiability being typically larger than zero is that it can be used to  
76 predict complex phenotypes, be it a disease or productive traits. This is an important issue  
77 since the use of microbiome data has the potential to alter how medical diagnosis in  
78 humans or breeding decisions agricultural species are performed. Several studies have  
79 demonstrated the potential value of microbiome data for complex-trait prediction. For  
80 example, Rothschild et al. [9] showed that microbiome can be used to improve accuracy  
81 in the prediction of obesity and many other phenotypes in humans. Likewise, Lloyd-Price  
82 et al. showed that microbiome-data was predicted if future outbursts of bowel disease  
83 [10]. In cattle, various studies have shown the predictive power of microbiome for  
84 methane emission from rumen microbiome [4,11], feed efficiency and carcass traits in  
85 pigs [12,13], and various plant phenotypes (e.g., crop yield and diseases predicted from  
86 the microbiota data from the rhizosphere, [14]). On the other hand, since the  
87 groundbreaking study of Meuwissen, Hayes and Goddard [15], the prediction of complex  
88 traits using genome information has been embraced in both plant [16] and animal  
89 breeding [17] as well as in human genetics [18]. Therefore, a natural step further is  
90 combining host’s genome and microbiome information to improve complex-trait  
91 prediction, a topic that is currently receiving much attention [12,19].

92

93 Importantly, microbiome composition can be affected by the host’s genome. For instance,  
94 Wang et al. [20] argue that it is evolutionarily justified that the microbiome is under  
95 partial host genetic control since a non-negligible fraction of cells in an adult body is

96 made up of microbes, especially in the gut. Beginning with the seminal work by Pomp's  
97 team [21], several studies have confirmed the relationship between host's genotype and  
98 microbiome composition, e.g., [20,22,23]. These microbiome genome-wide association  
99 studies (mGWAS) suggest that microbiome abundances can be treated as any other  
100 complex trait in humans or livestock [22]. For instance, Crespo-Piazuelo et al. [24] or  
101 Ramayo-Caldas *et al.*, [25,26] identified several quantitative trait loci (QTL) that  
102 modulate gut bacterial and eukaryotic communities. In general, although the 'heritability'  
103 of each genera or OTU (Operational Taxonomic Unit) is typically weak, considering the  
104 whole microbiome simultaneously should increase power [27].

105

106 Large scale studies in humans suggest a predominant role of the environment in shaping  
107 the gut microbiome [9]. However, regardless of the relative importance of genetic and  
108 environmental factors in shaping the microbiota, microbiome composition *per se* can  
109 have predictive value. Yet, the use of microbiota for prediction of future  
110 phenotypes/disease outcomes, require some level of stability of the microbiome  
111 throughout time. In the case of the gastrointestinal tract, microbiota colonization starts at  
112 birth, where vertical transmission through the mother's birth canal occurs. Afterward,  
113 microbiota diversity and richness tend to increase as the host ages and reaches stability at  
114 adulthood [28,29]. In ruminants, populations inhabiting the rumen progressively appear  
115 after birth and partly persists throughout life [30].

116

117 As noted, the genome-microbiome-phenome is a complex system; understanding the  
118 links between host-genome, microbiota, and phenotypes is an important step towards the  
119 effective use of microbiome data for complex trait prediction. In all, despite published  
120 reports, we still lack detailed guidelines on the joint usage of microbiome and genome  
121 information for complex trait prediction, and on the reliability of parameter inferences.  
122 We are ignorant of the number of genes affecting microorganism abundance that can be  
123 confidently identified, or on how many microorganism taxa can influence a given  
124 phenotype. With this work, we aim to contribute to this important topic focusing on three  
125 inter-related questions:

126

- 127 1. How useful can the microbiome be for complex trait prediction?
- 128 2. Are microbiability estimates reliable?

129 3. Can the underlying biological genome-microbiome-links be inferred at a system-  
130 level? In a more refined level, can microbiome groups (e.g., OTUs, genera) with  
131 sizable causal effects on phenotypes be identified with the typical size of  
132 microbiome data sets?

133

134 In this study, we address the questions mentioned above via a novel simulation strategy  
135 that uses real microbiome and genotype data as input and proposing a variance-  
136 component approach which, in the spirit of mediation analyses, quantifies the proportion  
137 of phenotypic variance explained by genome and microbiome, and dissects it into direct  
138 and indirect effects. Importantly, the approach allows simulating a partial genetic control  
139 of host's genome on the microbiome. This is accomplished using a partial permutation  
140 approach that preserves the distribution of the genome and microbiome. We use Bayesian  
141 variable selection models to estimate parameters which contemplate the possibility that  
142 some or all the features available in the genome and/or the microbiome, have no effects  
143 on the trait of interests. We investigate the questions presented above across diverse  
144 scenarios regarding the links between host genomes and microbiomes, and of their  
145 relations with a complex trait.

146

## 147 **Results and Discussion**

148

149 The exact nature of the links between genome (**G**), microbiome (**B**), and phenotype (**y**)  
150 are largely unknown and will likely vary from case to case. However, we will use the six  
151 generic causal models ('scenarios') depicted in Fig 1 to shed light on the nature of the  
152 genome-microbiome-phenome links. In the 'Null' scenario, there is no link between any  
153 of the data-layers; while this is unlikely, it serves as an 'overall null hypothesis' and it is  
154 useful to assess potential biases in parameter estimates. Model 'Genome' assumes that **G**  
155 only affects the phenotype. In turn, only **B** has a direct effect on phenotype in  
156 'Microbiome' and 'Indirect' scenarios. The Indirect scenario, however, allows for some  
157 of the causative abundances to be controlled genetically. This would be similar to a  
158 scenario where a phenotype is directly controlled by gene expression levels and  
159 expression in turn is controlled genetically [31,32]. The 'Joint' scenario is the simplest  
160 configuration for a trait under the influence of both genes and microbiome. It assumes  
161 microbiome and genome are independent and that their effects on the phenotype are also  
162 independent. The Joint model is the most widely assumed, implicitly, or explicitly, in the

163 literature, e.g., [4,9,12]. The ‘Recursive’ model is similar to the Joint model; however,  
164 the Recursive model contemplates the possibility that some causative OTU may be under  
165 partial genetic control by the host. Therefore, in this case, the genome has both direct and  
166 indirect (microbiome-mediated) effects on phenotypes. Note the Recursive model does  
167 not assume that the same loci have simultaneously direct and indirect effects, neither it  
168 assumes that all OTU abundances are under genetic control.

169

170

171

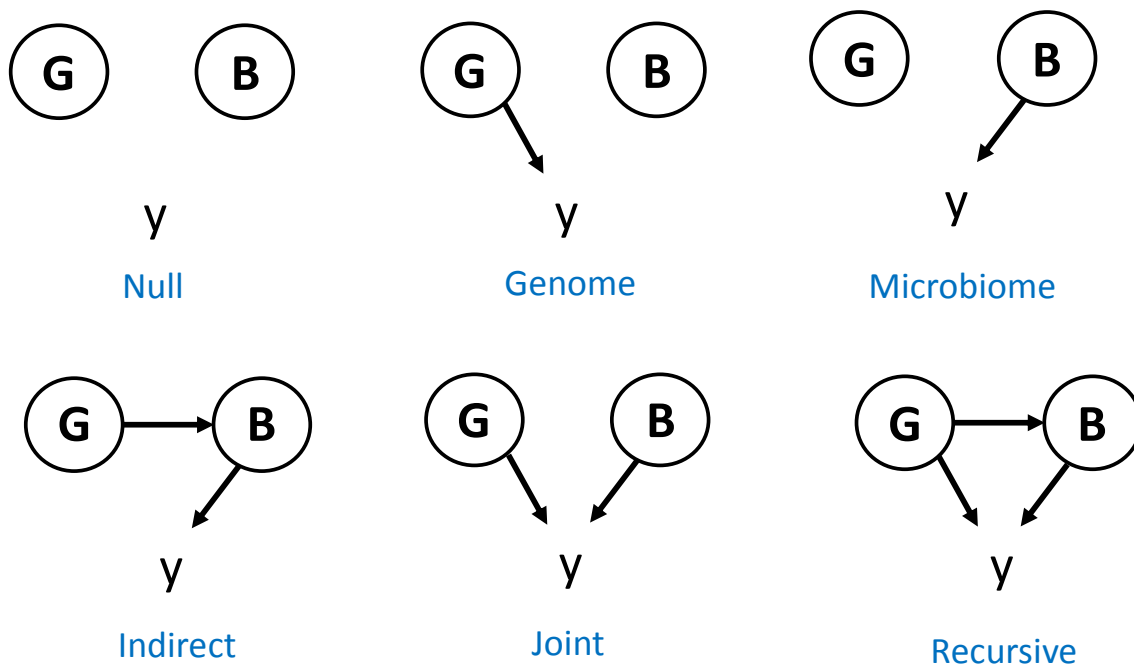

173

174 **Fig 1.** Representation of the scenarios evaluated: **G**, genome, typically comprises marker  
175 data; **B**, microbiome; **y**, phenotype of interest; arrows indicate causality. An arrow from  
176 **G** to **y** indicates that there is a subset of **G** elements (causative SNPs) that influence **y**; an  
177 arrow from **G** to **B** indicates there exists a subset of **G** that influences a subset of  
178 abundances in **B** which, in turn, may also influence **y**. An arrow departing from **B**  
179 indicates there is a subset of microbial abundances (the causative abundances) that  
180 influence **y**. The SNPs affecting **B** need not necessarily be the same SNPs affecting **y**  
181 directly in the Recursive scenario. Note **B** can contain one or more sets of abundances  
182 such as archaea and bacteria communities, or different time or site sampling points.  
183 Without loss in generality, we assume **B** is a single community.

184

185 We use the causal models depicted in Fig 1 to simulate genome-microbiome-phenotype  
186 data using different configurations regarding the number of causative loci (QTN) and the  
number of OTUs with effects on phenotypes, as well as the number of OTUs that were

187 affected by host's genome. Table 1 summarizes the simulation models and parameter  
188 values.

189

190 **Table 1.** Definition of scenarios evaluated and parameters chosen: **G**, genome; **B**,  
191 microbiome; **y**, phenotype of interest;  $N_{QTN}$ , number of SNPs with a direct causal effect  
192 on **y**;  $N_{OTU}$ , number of OTUs with a direct effect on **y**;  $N_{OTU(g)}$ , number of OTUs with a  
193 direct effect on **y** that are genetically determined, i.e., they are a subset of  $N_{OTU}$ ;  $h^2$  is  
194 heritability,  $b^2$  is microbiability, and  $r^2 = h^2 + b^2$ .

195

| Scenario   | Abbreviation | $N_{QTN}$ | $N_{OTU}$ | $N_{OTU(g)}$ | $r^2$ | $h^2$ | $b^2$ |
|------------|--------------|-----------|-----------|--------------|-------|-------|-------|
| Null       | 0            | -         | -         | -            | 0     | 0     | 0     |
| Joint      | J            | 100       | 25        | 0            | 0.25  | 0.125 | 0.125 |
|            |              |           |           |              | 0.50  | 0.25  | 0.25  |
| Genome     | G            | 100       | 0         | 0            | 0.25  | 0.25  | 0.00  |
|            |              |           |           |              | 0.50  | 0.50  | 0.00  |
| Microbiome | M            | 0         | 25        | 0            | 0.25  | 0.00  | 0.25  |
|            |              |           |           |              | 0.50  | 0.00  | 0.25  |
| Recursive  | R            | 100       | 25        | 25           | 0.25  | 0.125 | 0.125 |
|            |              |           |           |              | 0.50  | 0.25  | 0.25  |
| Indirect   | I            | 0         | 25        | 25           | 0.25  | 0.00  | 0.25  |
|            |              |           |           |              | 0.50  | 0.00  | 0.50  |

196

197 **Table 2.** Scenarios used to evaluate sensitivity to the number of causative OTUs. Symbols  
198 as in Table 1.

199

| Scenario  | Abbreviation | $N_{QTN}$ | $N_{OTU}$ | $N_{OTU(g)}$ | $r^2$ | $h^2$ | $b^2$ |
|-----------|--------------|-----------|-----------|--------------|-------|-------|-------|
| Joint     | J10          | 100       | 10        | 0            | 0.50  | 0.25  | 0.25  |
|           | J100         | 100       | 100       | 0            | 0.50  | 0.25  | 0.25  |
|           | J250         | 100       | 250       | 0            | 0.50  | 0.25  | 0.25  |
| Recursive | R10          | 100       | 10        | 5            | 0.50  | 0.25  | 0.25  |
|           | R100         | 100       | 100       | 50           | 0.50  | 0.25  | 0.25  |
|           | R250         | 100       | 250       | 125          | 0.50  | 0.25  | 0.25  |

200

201

202 **A novel data-driven strategy to generate microbiome-genome-phenotype**  
203 **experiments**

204 Two facts make it the simulation of scenarios in Fig 1 challenging: (i) microbiome data  
205 follow zero-inflated highly leptokurtic multivariate distributions [33,34], it is not obvious  
206 how to sample from these distributions *conditionally* on genome data as required in the  
207 Recursive and Indirect scenarios; and (ii) it is difficult to obtain accurate estimates of key  
208 parameters, such as microbiability values, in the absence of large scale published – and  
209 public – datasets. To circumvent, or at least to alleviate, these constraints we use real data  
210 for both **G** and **B**. Specifically, we used publicly available data from two of the largest  
211 microbiome studies in livestock, genome data were downloaded from [11] and OTU  
212 abundances from [4].

213

214 Fig 2 recapitulates the simulation strategy. Full details are given in Material and Methods  
215 section, and R code to replicate the analyses are in  
216 <https://github.com/miguelperezenciso/simubiome>). We assume the effects of the  
217 causative microbiome abundances are additive on the log scale. Simulation under the  
218 Joint scenario is straightforward, since **G** and **B** act independently: sample a list of  
219 causative SNPs and abundances, simulate their effects, and apply Eqn. 1 (Material and  
220 Methods) to generate phenotype values given observed genotypes and abundances. The  
221 case of Recursive and Indirect scenarios is not that obvious because causative abundances  
222 are under genetic control and a link must exist between **G** and **B** (Eqn. 2 in Material and  
223 Methods). We solved this issue by rearranging abundances within individuals such that  
224 the desired correlation between abundance and individual's genotypes is attained (see  
225 Algorithm in Box 1 and R-code in  
226 <https://github.com/miguelperezenciso/Simubiome/blob/master/sortCor.R>). This strategy  
227 has the important advantage that the distribution of abundances is not changed.

228



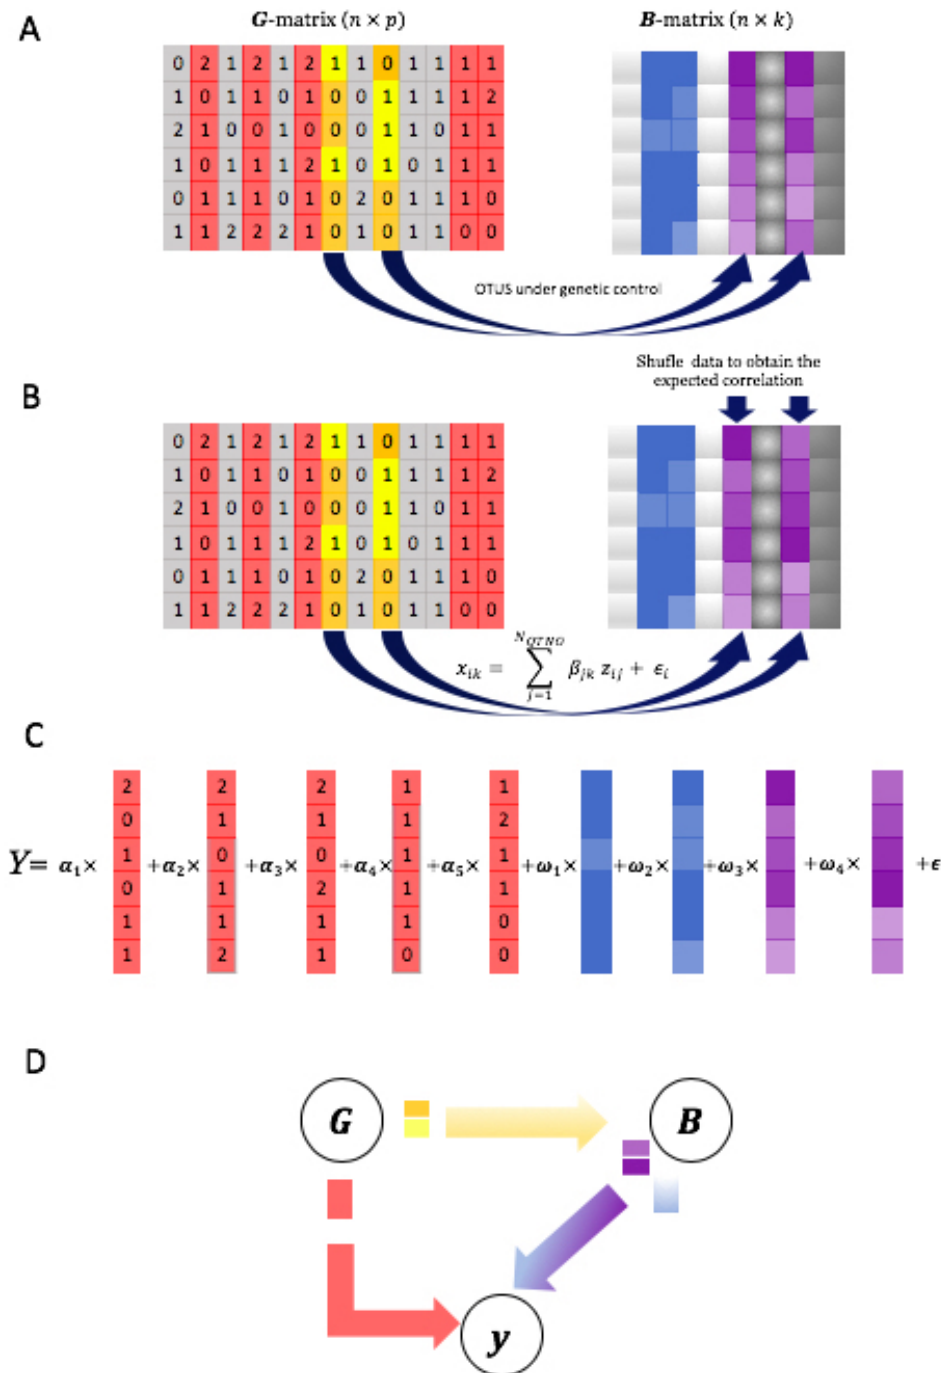

229

230 **Fig 2:** Simulation scheme for the Recursive scenario, i.e., the most complex scenario (Fig  
 231 1). **A)** Real input data comprises  $p$  genotypes (**G** matrix) and  $k$  taxa abundances (**B**  
 232 matrix). SNPs in grey are neutral, those in red act directly on the phenotype  $y$ , and those  
 233 in yellow/orange influence some OTU abundances (marked in magenta color in **B**  
 234 matrix); abundances in blue are not genetically controlled. **B)** Given simulated effects, a  
 235 genotypic value controlling the abundances is obtained via Eqn. 2. To fulfill the required  
 236 heritability, abundances in magenta are reordered; high abundances (represented by a  
 237 darker color) are associated with genotype '1' just to simplify visualization. A single SNP  
 238 is shown as causative for each of the two OTUs but there is no limit in practice. **C)** The  
 239 phenotype is simulated by adding the genome and the microbiome contributions plus a  
 240 residual. **D)** The general causal diagram is shown.

241

242 **How useful can microbiome be for complex trait prediction?**

243 This depends on how much phenotypic variance is jointly explained by the genome ( $h^2$ )  
244 and the microbiome ( $b^2$ ), but also on how efficiently methods capture the relationship  
245 between the microbiome and the phenotype, and on how stable the microbiome is. Note  
246 prediction accuracy is conditionally independent of whether the microbiome itself is  
247 heritable or not. This means that, *given* observed abundances **B** and observed genotypes  
248 **G**, it does not matter whether the biological process generating **B** is affected by **G**. In  
249 other words, prediction should not be affected by whether the Joint or Recursive scenarios  
250 hold, for a constant  $r^2 = h^2 + b^2$ . The implications for breeding, however, could be  
251 dramatically different. Breeding schemes targeting the microbiome could be designed  
252 provided the Recursive scenario holds but make no sense under the Joint scenario.

253

254 We compared predictive performance of Bayes C [15] when both genome and  
255 microbiome are employed in the model (*Bayes Cgb*) only genome (*Bayes Cg*), or only  
256 microbiome data (*Bayes Cb*). First, we verified the null model resulted in no false  
257 predictive accuracies (Fig S1A). Fig 3 shows simulated predictive accuracies for the two  
258  $r^2$  values considered (0.25 and 0.50) and for each causative scenario (Fig 1). Predictive  
259 accuracies using *Bayes Cgb* were consistently the best. As expected, this was especially  
260 the case when both  $h^2$  and  $b^2$  are larger than zero, that is, when Joint or Recursive scenario  
261 hold. In these scenarios, using both sources of variation clearly improved prediction  
262 compared to using only genome (*Bayes Cg*) or microbiome data (*Bayes Cb*). Importantly,  
263 predictive accuracy was somewhat lower in Joint and Recursive scenarios than in  
264 Microbiome or Genome scenarios. This indicates that predictive accuracy does not  
265 depend only on total  $r^2$ , but also on how this variance is split between genome and  
266 microbiome. Although this likely occurs because of the larger noise in Recursive or Joint  
267 scenarios than in Microbiome or Genome scenarios, it also suggests that our analysis  
268 strategy may not be optimum. There is room to develop more efficient tools, especially  
269 when the Recursive scenario holds. Note that variance of prediction was larger in the  
270 Recursive than in the Joint scenario, i.e., the fact that some abundances are inherited is  
271 an additional source of noise.

272

273 It is noticeable that predictions were better when only the microbiome influenced the  
274 phenotype than when the genome was the only source of variation, a phenomenon also

275 observed with real data [11,12,19]. In this simulation, this occurs likely because the  
276 number of causative effects and of input variables (SNPs vs. OTUS) is smaller in the  
277 Microbiome or Indirect scenarios than in the Genome scenario. In fact, we do observe a  
278 consistent negative correlation between the number of causative OTUs and predictive  
279 accuracy in both Joint and Recursive scenarios (Fig 4A).

280

281 In all, our results suggest that predictive accuracy could be increased by ~ 50 % when  
282 considering microbiome data, provided microbiability is of the same order as heritability  
283 (Fig 3). We speculate that this is probably an upper limit, since it will be difficult to have  
284 microbiome data collected homogeneously across time and in different locations. While  
285 individuals can be genotyped at birth, the microbiome in early life is not representative  
286 of adult or later stages. Maltecca et al., for instance, show that early life microbiota is not  
287 a good proxy for carcass composition in pigs [35].

288

289 We observed, roughly, a two-fold increase in predictive accuracy when doubling  
290 heritability for Genome, Joint and Recursive scenarios, and a 50% increase for  
291 Microbiome or Indirect scenarios (Fig 3A vs. 3B).

292

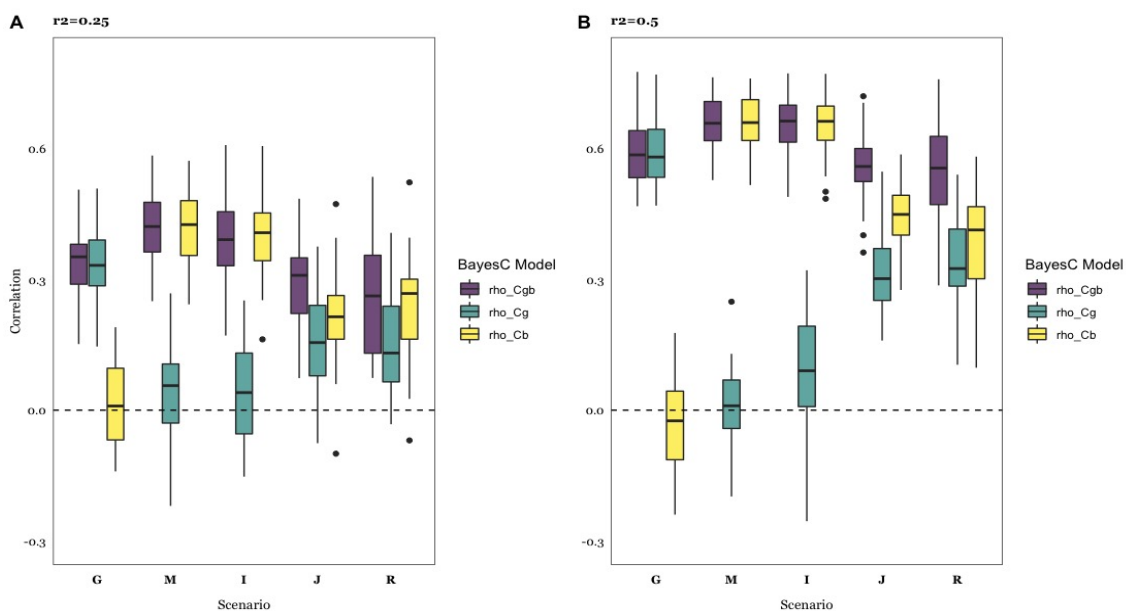

293

294 **Fig 3.** Predictive accuracy, computed as correlation between predicted and observed  
295 phenotypes across causal scenarios (Fig 1), for each of the Bayes C models: Cgb  
296 considers microbiome and genome; Cg includes genome data only, and Cb includes  
297 microbiome data only. **A:**  $r^2 = 0.25$ ; **B:**  $r^2= 0.50$ . Details of scenarios are in Table 1: G,  
298 Genome; M, Microbiome; I, Indirect; J, Joint; R, Recursive. Results are average of 30  
299 replicates per case.

300

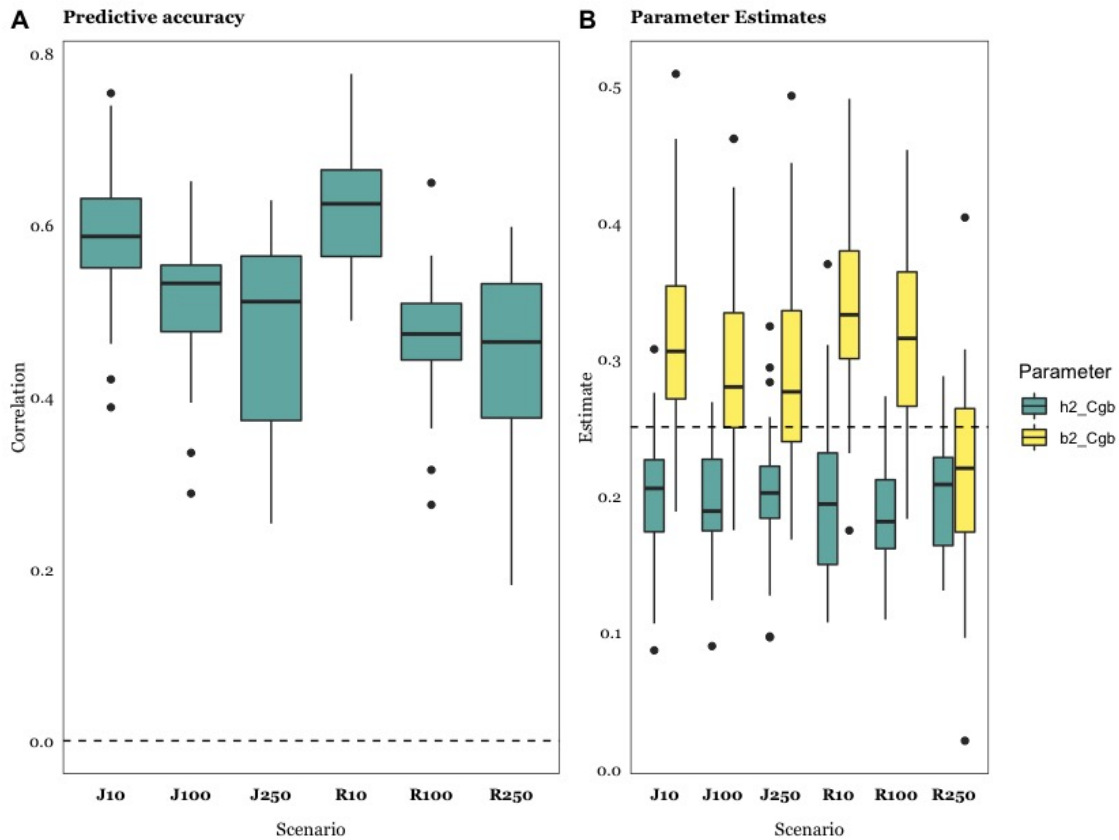

301

302 **Fig 4.** Effect of varying number of causative OTUs,  $r^2 = 0.5$ . **A:** Predictive accuracy,  
303 computed as correlation between predicted and observed phenotypes, using Bayes Cgb.  
304 **B:** Heritability and microbiability estimates using Bayes Cgb. Details of scenarios are in  
305 Table 2 and diagrams in Fig 1: Jx, Joint scenario; Rx, Recursive scenario, with x being  
306 the number of causative OTUs ( $x = 10, 100, 250$ ), half of them under genetic control.  
307 Results shown are the average of 30 replicates.

308

### 309 Are microbiability estimates reliable?

310 Reliable parameter estimates are needed to optimize the design of breeding schemes or  
311 microbiome wide association studies (MWAS) [36]. They are also needed for  
312 understanding the biology behind the interaction of microbiome and complex phenotypes.  
313 Thus far, microbiability has been usually estimated using 'standard' linear methods, e.g.,  
314 [4,9,27], much as we have done here. It is of interest then to know how accurate these  
315 estimates could be.

316

317 Fig 4 shows estimates of variance components for each of the scenarios in Table 1. Bayes  
318 Cgb allows us to assess whether  $h^2$  and/or  $b^2$  are different from zero: microbiability  
319 estimate is near zero when the data are simulated according to the Genome scenario and  
320 heritability is zero when the Indirect or Microbiome scenarios hold, as it should.

321 Similarly, both  $h^2$  and  $b^2$  estimates are near zero when the null scenario holds (Fig S1B).  
322 An overestimation of  $b^2$  is nevertheless evident in Fig 4, and it does not vanish at higher  
323  $r^2$ . This upward bias in  $b^2$  estimate is accompanied by an underestimation of  $h^2$ , indicating  
324 that variance estimates are confounded when using *Bayes Cgb* model. This bias decreases  
325 though when the number of causative OTUs increases. For instance, the bias in  $b^2$   
326 estimate is  $\sim 40\%$  when  $N_{\text{OTU}} = 10$  but is reduced to  $\sim 10\%$  with  $N_{\text{OTU}} = 250$  (Fig 4B).  
327 Therefore, it is likely that the presence of a few causative OTUs, but of large effect,  
328 combined with the presence of highly leptokurtic abundance distributions, may result in  
329 biased parameter estimates. This should be considered when interpreting microbiability  
330 estimates in real experiments. For instance, Difford et al. [4] report estimates  $h^2 = 0.21$   
331 and  $b^2 = 0.13$  ( $N = 750$ ), finding **G** and **B** to behave independently. Assuming the number  
332 of causative OTUs is small compared to that of SNPs with an effect on abundances  
333 (QTNs), we can presume Difford's estimate of  $b^2$  to be inflated. This means that the actual  
334 microbiome contribution may be too small to improve prediction over that obtained from  
335 using marker data exclusively. Although authors focused on inference and not so much  
336 in prediction, Difford et al reported that no bacteria genera were significantly associated  
337 with methane emissions [4]. Other authors in turn have reported polymicrobial  
338 associations, including members of bacterial, archaeal, fungal, and protozoan  
339 communities, with methane emissions, e.g., [11,25,37–39].

340

341 For comparison, Fig 5B,D show the estimates obtained with *Bayes Cg*, when only  $h^2$  is  
342 estimated, or *Bayes Cb*, only  $b^2$  is estimated. The most noticeable aspect is that bias in  $b^2$   
343 estimates is somewhat reduced relative to that found with *Bayes Cgb*, signaling again  
344 some confounding between  $b^2$  and  $h^2$ . Bias was reduced overall at higher  $r^2$  but did not  
345 vanish.

346

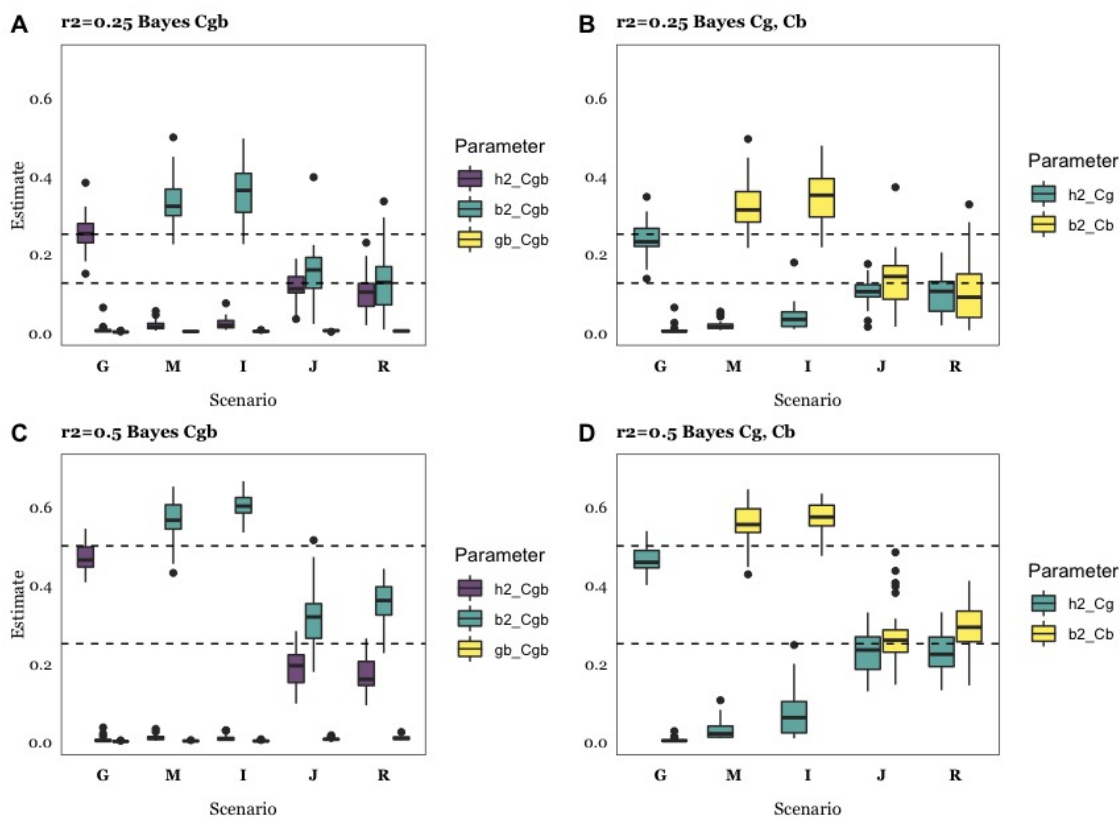

347

348 **Fig 5:** Estimates of heritability ( $h^2$ ), microbiability ( $b^2$ ), and correlation between genome  
 349 and microbiome ( $gb$ ) for each of the three Bayes C analysis models: Cgb includes  
 350 microbiome and genome in the model (left panels); Cg includes genome only, and Cb  
 351 includes microbiome data only (right panels). Upper rows correspond to  $r^2 = 0.25$  and  
 352 lower rows to  $r^2 = 0.50$ . Details of simulation scenarios are in Table 1: G, Genome; M,  
 353 Microbiome; I, Indirect; J, Joint; R, Recursive. Horizontal dashed lines indicate true  $h^2$   
 354 or  $b^2$  parameter values (0.125, 0.25, 0.5 depending on the scenario and on  $r^2$ ). Results  
 355 are average of 30 replicates. **A:**  $r^2=0.25$ , Bayes Cgb estimates ( $h^2$ ,  $b^2$  and  $gb$ ); **B:**  $r^2 =$   
 356 0.25, Bayes Cg ( $h^2$ ) and Cb ( $b^2$ ) estimates; **C:**  $r^2 = 0.50$ , Bayes Cgb estimates; **D:**  $r^2 =$   
 357 0.50, Bayes Cg and Cb estimates. Data are average of 30 replicates per case.

358

359 **Can the underlying biological scenario be recovered? Can causative OTUs be**  
 360 **identified?**

361 An important goal of many experiments is to dissect the biological basis of microbiome  
 362 and genome interactions, even if this is not strictly needed for prediction. So far, our  
 363 simulations suggest that standard statistical methods can be used to quantify – with some  
 364 bias – microbiability contribution to phenotypic variance. It also seems feasible to  
 365 distinguish whether the Microbiome or Genome scenario fits real data best. Similarly, it  
 366 seems plausible to assess when **G** and **B** contribute to the phenotypic variance, i.e. when  
 367 Recursive or Joint scenarios are plausible.

368



369 Could Joint vs. Recursive scenarios be distinguished? Can data point to which of Indirect  
370 or Microbiome scenarios is more plausible, if any? Further, can causative OTUs be  
371 identified? These are far more difficult questions to answer than assessing prediction  
372 performance or estimating microbiability. Compare variance component estimates  
373 obtained under the Joint or Recursive scenarios (Fig 5): they are nearly identical for the  
374 same  $r^2$ . The two scenarios differ in that at least some causative OTUs abundances can  
375 be under partial genetic control in the Recursive scenario. The Recursive scenario should  
376 result in a covariance between  $\mathbf{G}$  and  $\mathbf{B}$ . We conjectured that the two scenarios could be  
377 distinguished by analyzing the covariance  $Cov(\mathbf{u}^{(i)}, \mathbf{v}^{(i)}) / Var(\mathbf{y})$  (see methods).  
378 Unfortunately, these estimates are close to zero irrespective of the true scenario (Fig 5A,  
379 C). The likely reason is that the actual fraction of phenotypic variance explained by  
380 indirect effects is *conditionally* negligible. Note there can be a genetic effect of  $\mathbf{G}$  on  $\mathbf{B}$   
381 but, for our purposes, we are interested only in those genes that affect causative OTUs  
382 (i.e., those that affect the phenotype) and not on the whole microbial system.

383

384 An alternative approach to infer whether the Recursive causative scenario holds or not is  
385 to run a genome-wide association study (GWAS) for each of the OTU abundances on  
386 each SNP, where the SNP P-values can indicate a genetic basis for some of the  
387 abundances. If we identify significant SNPs for OTUs likely influencing  $\mathbf{y}$ , we could  
388 conclude that the Recursive scenario is plausible. Unfortunately, this analysis can be  
389 doomed by the large number of tests to be realized, i.e.,  $N_{OTU} \times N_{SNP}$ . To illustrate the  
390 caveats of GWAS on abundances, Fig 6A shows the distribution of  $-\log_{10}$  P-values of  
391 neutral SNPs vs. SNPs with an effect on abundances. Assume we take the 5% empirical  
392 threshold of the neutral P-value distribution as indicative of association. Simulations  
393 suggest that only  $\sim 3\%$  of causative SNP P-values will be above that threshold, i.e.,  
394 approximately what is expected by chance. These P-values depend of course on the actual  
395 number of causative SNPs and on abundance heritabilities, but most evidence so far  
396 points to a weak relationship between genome and microbiome [22]. We warn it is going  
397 to be very difficult to identify abundance causative SNPs using GWAS information alone  
398 [9,20].

399

400 Another question of interest is how many of the OTUs affecting the phenotype can we  
401 expect to discover. One option is to count the frequency of a given OTU entering into the  
402 Bayes C model during sampling. Fig 6B shows the probability of including a causative

403 OTU in the Bayes C sampling chain, which varied between ~5% ( $b^2 = 0.125$ ) to ~20%  
404 ( $b^2 = 0.25$ ). About 50% ( $b^2 = 0.25$ ) or 30% ( $b^2 = 0.125$ ) of causative OTUs were among  
405 the 5% most frequently included OTUs in the Bayes C chain, on average. Since the  
406 number of causative OTUs was 25, the rate of false positives was high nevertheless. We  
407 can conjecture that only a few causative OTUs are likely to be identified in medium-sized  
408 experiments, such as this one.

409

410 An alternative approach is a Microbiome Wide Association Study (MWAS), i.e., to  
411 perform a linear regression of the phenotype on each of OTU abundances and then select  
412 the significant results as potential causative OTUs [4]. Fig 6C shows the average power,  
413 defined as the percentage of true causative OTUs within the 5% most significant results.  
414 Power was ~15% and ~20% for  $b^2 = 0.125$  and 0.25, respectively, in the Recursive  
415 scenario. Again, this is not too satisfactory, as we expect a high fraction of false positives.  
416 In this particular scenario, it is perhaps more useful to consider probabilities of inclusion  
417 in the Bayes C chain rather than at P-values since the former are the result of a joint  
418 analysis of all OTUs and can be used directly for prediction.

419

420

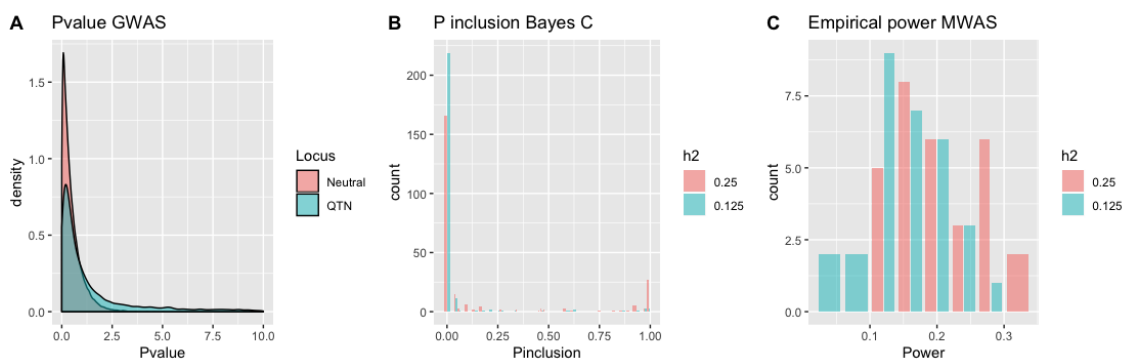

421

422 **Fig 6:** *A) Distribution of  $-\log_{10}$  P-values of a GWAS of abundances on SNP data; B)*  
423 *Probability of inclusion in the Bayes Cgb model of causative OTUs for the two levels of*  
424 *microbiability considered. C) Power of identifying a causative OTU computed as the*  
425 *probability of exceeding the 95% threshold of the empirical distribution of P-values in*  
426 *an MWAS for the Recursive scenario.*

427

428 Finally, we investigated the pattern of abundance heritabilities. Fig 7A shows the  
429 simulated heritabilities for the causative, inherited OTUs, which approximately follows a  
430 gamma distribution, together with estimated heritabilities for the causative OTUs in the  
431 Recursive scenario. We observe that both distributions are rather similar although  
432 estimates are somewhat shrunk towards zero, a consequence of using a REML-like prior.



433 A problem of course is that we do not know which OTUs are inherited and which are not,  
434 and the true distribution of OTU heritability estimates will be a mixture. Fig 7B illustrates  
435 the heritability distributions of neutral (non-inherited) and causative (inherited) OTUs. In  
436 Fig 7B, we mixed 1.7 neutral OTU per causative OTU. This is completely arbitrary since  
437 we do not know the actual number of OTUs under genetic control, but we did so because  
438 the resulting mixture is similar to the distribution of heritabilities observed by Difford et  
439 al. (Fig 7C). If distributions in Fig 7B were representative of the true state of nature, this  
440 would suggest that about  $1/(1+1.7) \sim 40\%$  rumen OTUs could show some genetic additive  
441 variance in the experiment reported by Difford et al.[4].  
442

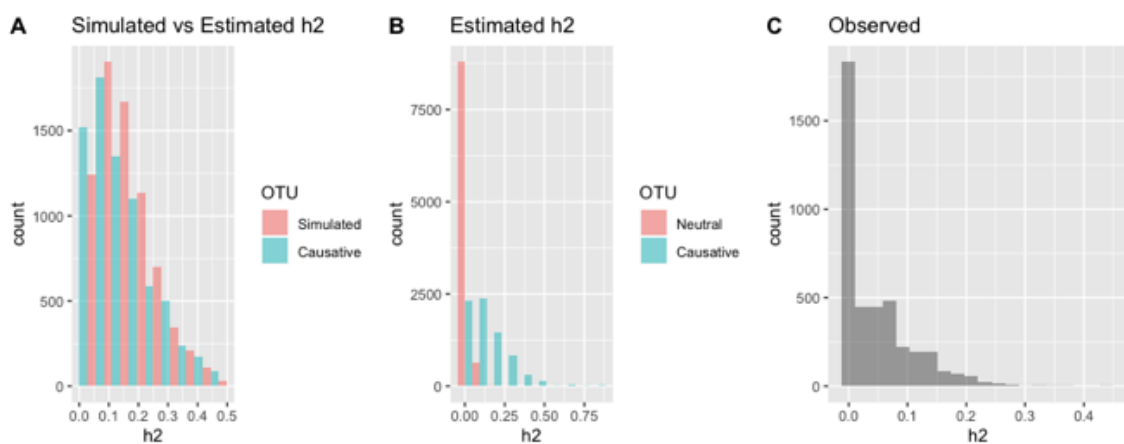

443 **Fig 7: A:** ‘True’ (simulated) and GBLUP estimated distribution of abundance  
444 heritabilities for causative OTUs in the Recursive scenario. **B:** GBLUP estimated  
445 distribution of abundance heritabilities for neutral and causative OTUs in the Recursive  
446 scenario. **C:** Actual distribution of OTU abundance heritabilities reported by Difford et  
447 al.[4].  
448  
449

## 450 Discussion

451 Fig 1 represents but highly simplified relationships between the genome, microbiome,  
452 and phenotype. These scenarios are nevertheless important to interpret empirical data and  
453 can help to identify limiting factors in prediction. Further, provided a good fit is found,  
454 they will help in designing experiments that combine microbiome and genetic data. We  
455 chose parameter combinations that represent extreme case scenarios and we found that  
456 results were, qualitatively, robust to parameter choice such as  $r^2$ . A parameter that can be  
457 relevant though is the number of causative microbiome taxa, i.e., those with an effect on  
458 the phenotype. This number seems to affect the bias of microbiability estimates (Fig 4).  
459

460 Here, we have proposed a new simulation procedure that addresses some important  
461 challenges. First, the algorithm avoids the need for actual phenotype simulation by using  
462 real genotype and abundance data. Although we concede that this procedure may limit  
463 the generality of the study, e.g., in terms of data size, we believe the advantages of using  
464 real data are numerous, since no simulation procedure can accommodate all known and  
465 unknown subtleties of the highly dimensional distributions at hand. Second, we develop  
466 an ingenious permutation procedure (Box 1) that allows linking previously uncorrelated  
467 data to fit a desired genetic hypothesis. By also permuting all OTUs within a given cluster,  
468 we minimize disruption of the whole covariance structure (Fig S2).

469

470 Numerous studies have reported microbiability values for economically important traits  
471 e.g. [4,12,25,39], but their actual reliability is not known. Estimates may be affected by  
472 the estimation procedure. There are numerous alternatives to estimate  $b^2$ , among them  
473 Bayes C [15], GBLUP [40], Bayesian RKHS regression using either Bray–Curtis  
474 dissimilarities as relationship matrix [25] or with the variance-covariance from the  
475 log-transformed OTUs as kinship matrix[25,41]. Our results (Fig 5) indicate that BayesC  
476 estimates may be biased upwards, especially when  $b^2$  is higher than 0.25 and the number  
477 of causative OTUs is small. However, we found that estimates of  $b^2$  derived with Bayes  
478 C were very close to zero in the null scenario (Fig S1B); therefore, we conclude that  
479 models using priors from the Spike-Slab family, which contemplate a priori the  
480 possibility of null effects, can be used to test whether heritability or microbiability is  
481 substantial. Ramayo-Caldas et al. [25] report that estimates using Bray-Curtis based  
482 kernels are higher than those using the log-transformed covariance matrix. The behavior  
483 of estimation methods for microbiability merits further research.

484

485 One conclusion from this work is that it is going to be difficult to distinguish between  
486 some underlying scenarios or to identify the causative OTUs and SNPs, at least using  
487 standard linear models as was done here. The distinction between Joint and Recursive  
488 scenarios is of special relevance for breeding. The latter assumes partial genetic control  
489 of some causative OTUs. Yet, we found both scenarios result in very similar patterns  
490 (Figs 3, 4, 5). Perhaps, a more powerful approach would be to use structural equation  
491 models (SEM), which allow including a variable both as independent and dependent.  
492 Saborio-Montero et al. [42] compared a linear bivariate (one OTU and the phenotype)  
493 model with a SEM but found few differences. One restriction of their approach is that one

494 SEM was fitted for each abundance. A whole-genome approach seems in principle more  
495 adequate; however, modeling recursive effects in this context is both statistically and  
496 computationally challenging because of the large number of SNP-OTU combinations that  
497 would need to be considered.

498

499 A line of research that we have not considered involves possible microbiome-DNA  
500 interactions. Although the number of possible interactions to consider can be huge when  
501 the number of SNPs and the number of OTUs is large, interactions between features in  
502 two high-dimensional sets can be modeled in a Gaussian context using co-variance  
503 functions. These functions are the Hadamard product of set-specific similarity matrices  
504 such as the Hadamard product of a SNP-derived and an OTU-derived ‘relationship’  
505 matrix. Such an approach has been used before to model, e.g. interactions between SNPs  
506 or between SNPs and environmental covariates (e.g., 43).

507

508 The usefulness of microbiome in prediction depends crucially on its stability in time and  
509 space. For instance, although measures of gastrointestinal microbiome abundances are  
510 known to be repeatable, it cannot be expected to remain stable throughout an individual’s  
511 life span. After weaning and under standard management conditions, e.g., constant diet  
512 and absence of antibiotic treatment, the diversity of monogastric gut microbiota increases  
513 with host age until its composition remains stable. Rumen microbial communities are  
514 highly resilient and host-specific [44,45] but change in early life. The transition towards  
515 a more stable an adult-like ruminal ecosystem occurs between weaning and one year of  
516 age [46]. Therefore, for prediction purposes, we recommend the inclusion of microbial  
517 information at least after weaning, preferably at adulthood. This may limit the usefulness  
518 of microbiota for prediction in breeding schemes as compared to genomic data in  
519 livestock.

520

521 At present, modeling the influence of microbiome abundances on complex phenotypes is  
522 an open area of research. Here we have presumed that the effects on abundances are  
523 additive in the log scale. Similar models are widely used in a diversity of scenarios, e.g.,  
524 multiplicative models are used to accommodate fitness effects in evolutionary genetics  
525 [47] or to deal with highly leptokurtic distributions such as raw abundances, an effect that  
526 is smoothed with the log transformation. In addition to the log-transformation, a widely  
527 popular choice in genetics is the threshold model [7], which assumes the presence of a

528 continuous liability (here abundances) with an effect value ‘0’ below a given threshold  
529 and ‘1’ otherwise. This model has the advantage of being independent on whether  
530 abundances are log-transformed or not and is also biologically sound since it is  
531 conceivable that a minimum microorganism abundance is required to trigger a particular  
532 effect. To test the robustness of the log-transformation, we simulated phenotypes such  
533 that 25% of causative abundance observations were above the threshold and the analysis  
534 was performed on the log transformed abundances as before. As could be expected, using  
535 a ‘wrong’ model for the analyses was detrimental to prediction but not dramatically (Fig  
536 8A). Parameter estimates were affected downwards compared to the multiplicative model  
537 (Fig 8B). We suggest that major conclusions from this work should hold even if the  
538 relationship between variables and phenotype is not strictly multiplicative.  
539

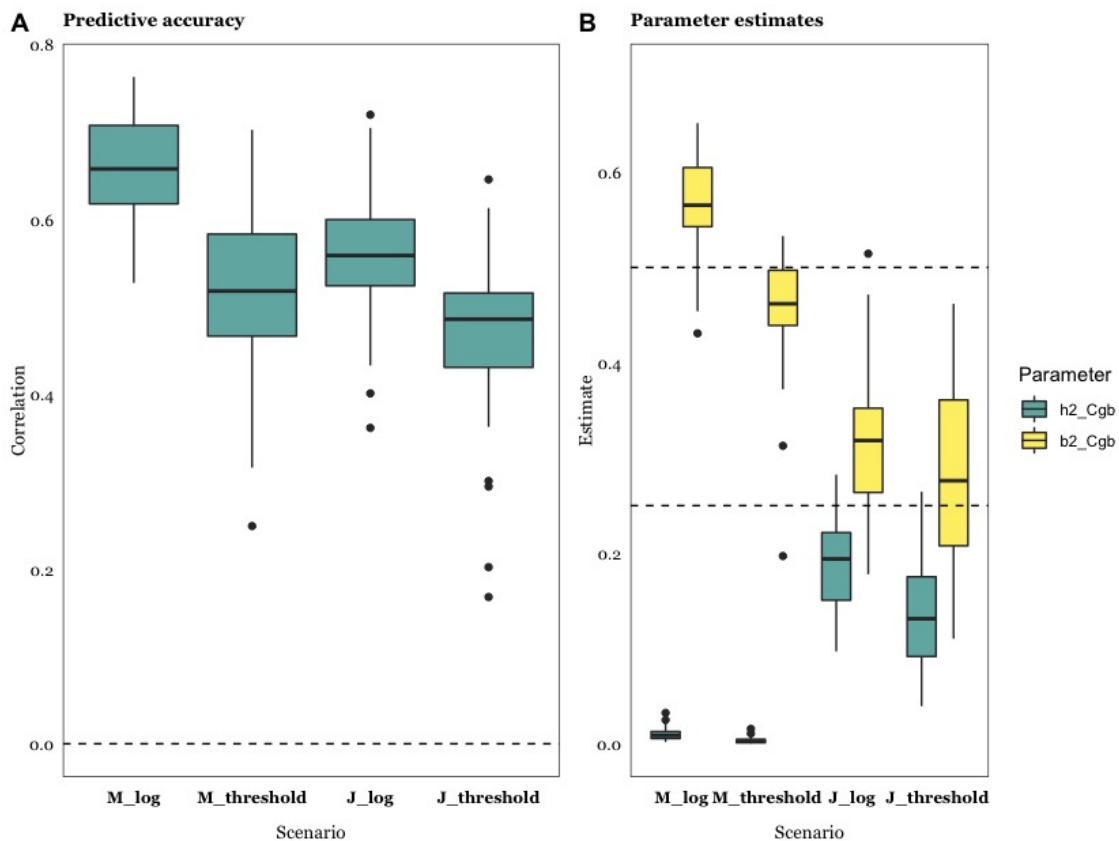

540  
541 **Fig 8.** Comparison of multiplicative (log) and threshold Microbiome (M) and Joint (J)  
542 scenarios ( $r^2 = 0.5$ ). **A:** Predictive accuracy, computed as correlation between predicted  
543 and observed phenotypes, using Bayes Cgb. **B:** Heritability ( $h^2$ ) and microbiability ( $b^2$ )  
544 estimates using Bayes Cgb. Results are average of 30 replicates. Scenarios M and J as  
545 specified in Table 1; the log transformation results are shown for completeness and are  
546 the same as in Figs 3 and 5. Data are average of 30 replicates.  
547

## 548 Conclusion

549 This study suggests that microbiome data can significantly improve the prediction of  
550 complex phenotypes, irrespective of whether some abundances are under direct genetic  
551 control or not. For this strategy to be successful, though, medium to large-sized  
552 experiments are required, the microbiome should be relatively stable and should be  
553 available before the phenotype is collected. This limits the usefulness of microbiome for  
554 prediction in breeding schemes as compared to genome data, which can be collected at  
555 birth and remains unchanged. Important potential applications remain nevertheless, such  
556 as predicting methane emission in cattle, feed efficiency, disease predisposition, or crop  
557 production using soil metagenome. Overall, we can be rather confident that standard  
558 linear methods can be used despite the highly leptokurtic distributions observed in OTU  
559 abundances. There is room for specific theoretical developments though, perhaps along  
560 the lines proposed by Saborio-Montero et al. [42], but these should be based on a better  
561 understanding of the relation between microbiome and phenotype. It seems critical to  
562 quantify, even approximately, the number of taxa affecting the phenotype and to  
563 characterize the distribution of their effects. We are far less optimistic in what regards the  
564 identification of causative OTUs, and in particular of the putative QTNs affecting relative  
565 abundances.

566

## 567 **Materials and Methods**

### 568 **Simulation Strategy**

569 There is ample literature and software available on the simulation of ‘standard’ complex  
570 phenotypes, e.g., [48–51]. These algorithms, however, are not suited for some of the  
571 scenarios posed in Fig 1. Here we propose simulating the joint influence of genome and  
572 microbiome on a quantitative trait by adding their contributions plus a random noise:

573

574

$$575 \quad y_i = \sum_{j=1}^{N_{QTN}} \alpha_j z_{ij} + \sum_{k=1}^{N_{OTU}} \omega_k x_{ik} + \varepsilon_i, \quad (1)$$

576

577

578 where  $y_i$  is the  $i$ -th individual record,  $\alpha_j$  is the genetic effect of  $j$ -th causal SNP (QTN),  
579 with  $j = 1, N_{QTN}$ , the number of QTNs,  $z_{ij}$  is the genotype of the  $i$ -th individual for  $j$ -th  
580 SNP coded say -1, 0 and 1 (strict additivity was assumed for all QTN),  $\omega_k$  is the linear  
581 effect of the  $k$ -th OTU abundance ( $x_{ik}$ ), with  $k = 1, N_{OTU}$ , the number of abundances that

582 influence the phenotype and  $\epsilon$  is a normally distributed residual. The OTU's coefficient  
583 can be interpreted as the expected change in phenotype per OTU's abundance unit  
584 increase. Since abundances are in the log scale, this is equivalent to a multiplicative effect  
585 model. Equation (1) is valid for all scenarios in Fig 1, except that the term involving  
586 markers  $\sum_{j=1}^{N_{QTN}} \alpha_j z_{ij}$  is removed in the Microbiome and Indirect scenarios whereas the  
587 term  $\sum_{k=1}^{N_{OTU}} \omega_k x_{ik}$  is removed in the Genome scenario.

588

589 For the Indirect and Recursive scenarios, we also need to model the variation in  
590 abundances ( $\mathbf{x}$ ) that is explained by the genome (Fig 1). Again, we can resort to a linear  
591 model where the abundance itself is treated as a standard complex phenotype:

592

$$593 \quad x_{ik} = \sum_{j=1}^{N_{QTN(k)}} \beta_{jk} z_{ij} + \epsilon_i, \quad (2)$$

594

595 where  $x_{ik}$  is the abundance level of the k-th OTU that is under partial genetic control for  
596 i-th individual,  $\beta_j$  is the genetic effect of j-th QTN on abundance, and  $z_{ij}$  is the genotype  
597 of the i-th individual for j-th SNP. The j-th sum is across the QTNs influencing k-th  
598 abundance,  $j = 1, N_{QTN(k)}$ . Note abundances  $x_{ik}$  in Eqn. (2) are a subset of those in (1).  
599 There may be other non-causative abundances under genetic control, but this is irrelevant  
600 for our purposes. A phenotype following the Recursive scenario can then be simulated  
601 via a two-step procedure: first, simulate abundances ( $\mathbf{x}$ ) using Eqn. (2) followed by  
602 phenotype simulation using (1) given the abundances obtained.

603

604 We used real genome and microbiome data as input for the simulation procedure. We  
605 downloaded the rumen abundance table of 4,018 OTUs from dairy cattle rumen ( $N = 750$ ,  
606 [4]). A pseudo-count equal to one was added to zero abundances, which were next total-  
607 sum scaled and log-transformed. This results in much less leptokurtic and less asymmetric  
608 distributions than original raw abundances. In Eqns. 1 and 2,  $x_{ik}$  represent the already log-  
609 transformed abundances. As for genotypes, high-density array genotypes from 750 dairy  
610 cows among the total available were downloaded from [11]. To prune SNPs and facilitate  
611 computation, 35% of all genotypes with a minimum allele frequency of 0.01 and a  
612 maximum missing percentage of 1% were retained. A total of 32,204 autosomal SNPs

613 was finally retained. The few missing values were simply imputed with the mean. Thirty  
614 simulation replicates per scenario were simulated.

615

616 Under the Joint scenario, which assumes independence between **G** and **B**, we can simply  
617 sample the list of causative SNPs and abundances, simulate their effects, and apply Eqn.  
618 1 to generate phenotype values given observed genotypes and abundances. The case of  
619 Recursive and Indirect scenarios is not that obvious because we need to sample  
620 abundances that are under genetic control and a link must exist between **G** and **B** (Eqn.  
621 2). We solved this issue by rearranging abundances of a given OTU between individuals  
622 such that the desired correlation between abundance and individual's genotypes is  
623 attained. This strategy has the important advantage that the distribution of abundances is  
624 not changed. Suppose  $\gamma_{ik} = \sum_{j=1}^{N_{QTN0}} \beta_{jk} Z_{ij}$  is the simulated genetic effect of the *i*-th  
625 individual for *k*-th abundance (Eqn. 2) and that the desired heritability for that abundance  
626 is  $h_k^2$ . The algorithm (Box 1) is based on the simple observation that, given any two  
627 vectors **x** and **y**, correlation is maximum ( $\rho \sim 1$ ) when observations in both vectors are  
628 sorted and  $\rho$  is  $\sim$  zero when they are shuffled. Therefore, there must be some order  $\mathbf{y}_{sort}$   
629 then that fulfills, approximately, the constraint  $\text{cor}(\mathbf{x}, \mathbf{y}_{sort}) = \rho$ . For our purposes, we need  
630 to rearrange the observed abundances  $\mathbf{x}_k$  such that the correlation between rearranged  $\mathbf{x}_k$   
631 and  $\gamma_k$  is  $h_k$ , the square root of heritability for *k*-th abundance. The algorithm is detailed  
632 in the Box.

633

634 A drawback of this algorithm is that it locally breaks the covariance between abundances  
635 of different OTUs. To alleviate this, we permuted all abundances that fell within the same  
636 OTU cluster. We clustered abundances using R function `hclust(dist(.),`  
637 `method="ward.D2")` and cut the tree in  $K = 500$  clusters. We chose  $K = 500$  because the  
638 first quartile of intra-cluster average correlation was above the third quartile of the  
639 average correlation between random abundances, that is, clusters were made up of highly  
640 correlated abundances compared to average. We also explored  $K = 200$  but we did not  
641 find any difference neither in predictive accuracy nor in heritability estimates. To verify  
642 that the shuffling algorithm did not alter the whole structure of the data, we show the  
643 principal component analysis of the original and a few shuffled microbiome sets in Fig  
644 S3.

645



646

**Algorithm 1: Find a permutation of vectors  $\mathbf{x}$  and  $\mathbf{y}$  such that the correlation between permuted vectors is a predetermined value  $\rho$**

Take  $\mathbf{x}, \mathbf{y}, \rho$ , where  $\mathbf{x}$  and  $\mathbf{y}$  are arbitrary, uncorrelated vectors in  $R^n$  and  $0 \leq \rho \leq 1$  is the desired correlation. The aim is to find a permutation of  $\mathbf{y}$  such that correlation  $\text{cor}(\mathbf{x}, \mathbf{y}_{\text{sort}}) = \rho$ , approximately. The algorithm can be equally applied when  $\mathbf{x}$  and / or  $\mathbf{y}$  are integer numbers, normality is not required either. Performance of the algorithm improves as  $n$  increases and when normality holds.

1. Sort the values of  $\mathbf{x}$  and  $\mathbf{y}$  in increasing or decreasing order. The correlation  $\text{cor}(\mathbf{x}_{\text{sort}}, \mathbf{y}_{\text{sort}}) \cong 1$ .
2. Generate a dummy variable  $\mathbf{z} = \mathbf{y}_{\text{sort}} + \mathbf{e}$  where  $\mathbf{e}$  values are sampled from  $\mathbf{e} \sim N(0, S_y^2 \frac{1-\rho^2}{\rho^2})$ ,  $S_y^2$  is the sample variance of  $\mathbf{y}$ . The correlation  $\text{cor}(\mathbf{x}_{\text{sort}}, \mathbf{z}) \sim \rho$ .
3. Create an index variable  $\mathbf{iy}$  which indicates how  $\mathbf{y}_{\text{sort}}$  should be reordered according to  $\mathbf{z}$  order. This dummy index  $\mathbf{iy} = \text{order}(\mathbf{y})[\text{order}(\mathbf{z})]$  contains the order of  $\mathbf{y}$  when values are back-sorted according to the order of  $\mathbf{z}$ .
4. Reorder  $\mathbf{iy} = \mathbf{iy}[\text{rank}(\mathbf{x})]$  to match the index with positions  $\mathbf{y}_{\text{sort}}$  in the original vector  $\mathbf{x}$ . This is needed since  $\mathbf{x}$  remains unchanged and only  $\mathbf{y}$  is permuted.
5. The correlation  $\text{cor}(\mathbf{x}, \mathbf{y}[\mathbf{iy}]) \cong \rho$ .

Algorithm available at <https://github.com/miguelperezenciso/Simubiome>, see sortCorr function.

647

648 **Parameter fitting**

649 Little is known neither on the number of OTUs influencing a given phenotype nor on how  
650 many of those are partly inherited. For that reason, we chose some extreme, yet ‘educated’  
651 values for each of the five scenarios depicted in Fig 1. We considered  $r^2 = h_g^2 + h_b^2 =$   
652 0.25 and 0.50;  $r^2 = 0.25$  is grossly the value reported by Difford et al. 2019 with  $N = 750$ ,  
653 whereas values closer to  $r^2 = 0.50$  were reported by Wallace et al. in some farms. Overall,  
654 augmenting  $r^2$  values tries to mimic the effect of increasing sample size. We assumed  $h_g^2$   
655  $= h_b^2$  for Joint and Recursive scenarios, as also reported by Difford et al or Camarinha-  
656 Silva et al. approximately. The number of QTNs was fixed to 100. This figure is  
657 somewhat arbitrary, but the specific number of loci would not affect much the results.  
658 Barton et al. [52] showed theoretically that most properties of the infinitesimal model



659 converge as fast as the inverse of the number of loci, or  $\sim 1\%$  deviance with  $N_{\text{QTN}} = 100$ .  
660 In general, genomic prediction is known to be relatively insensitive to the number of  
661 QTNs [53]. As for individual genetic effects  $\alpha$ , numerous empirical and theoretical works  
662 show that they are not uniformly distributed and can be approximated by a gamma-like  
663 distribution [54,55]. Here we sampled genetic effects  $\alpha \sim \Gamma(\text{shape} = 0.2, \text{scale} = 5)$ , as  
664 suggested by Caballero et al. [56], and also used previously by us [57].

665

666 Much less is known on the number of causative OTUs ( $N_{\text{OTU}}$ ), although we can presume  
667 that  $N_{\text{OTU}}$  should be smaller than the number of QTNs. For instance, Duvallet et al. [36]  
668 found in a large meta-analysis that the human diseases studied were affected on average  
669 by 10 - 15 changes in abundances at the genus level. Here we considered  $N_{\text{OTU}} = 25$  (0.6%  
670 of all OTUs), although we also evaluated  $N_{\text{OTU}} = 10, 100$  and 250. Similarly, for the  
671 Recursive and Indirect scenarios, we took the extreme scenario where all causative OTUs  
672 are genetically determined, i.e.,  $N_{\text{OTU}} = N_{\text{OTU}(\text{g})}$ . The genetic effects  $\beta$  on abundances  
673 (Eqn. 2) were sampled from the same distribution  $\beta \sim \Gamma(\text{shape} = 0.2, \text{scale} = 5)$  as direct  
674 genetic effects  $\alpha$ . We are much more ignorant regarding the distribution of abundances'  
675 effects  $\omega$  on the phenotype (Eqn. 1). We took as proxy the regression coefficients of  
676 methane emission on abundances published by Difford et al. [4], in their supplementary  
677 information S4, which can be approximated by a  $\Gamma(\text{shape}=1.4, \text{scale}=3.8)$ . Fig S3  
678 compares both gamma distributions and the fit to empirical data. This model predicts that  
679 the variance of OTUs' effects is wider and of larger individual effect on average than that  
680 of SNPs. Although this is speculative at this point, it is sensible to assume that only a few  
681 taxa do have a sizeable influence on the phenotype, say methane emission.

682

### 683 **Analysis**

684 We used Bayes C algorithm [15] as implemented in BGLR [58] to assess prediction  
685 performance and reliability of parameter estimates. We also tested Bayesian RKHS  
686 regression, equivalent to GBLUP [40], but results were similar or worse and are not  
687 presented. Three models were used to analyze the data:

688

$$689 \text{ Bayes Cgb: } \mathbf{y} = \mathbf{Z} \mathbf{a} + \mathbf{b} \mathbf{W} + \mathbf{e} \quad (3a)$$

690

$$691 \text{ Bayes Cg: } \mathbf{y} = \mathbf{Z} \mathbf{a} + \mathbf{e} \quad (3b)$$

692

693 Bayes Cb:  $\mathbf{y} = \mathbf{W} \mathbf{b} + \mathbf{e}$  (3c)

694

695 where  $\mathbf{y}$  is the vector containing the simulated phenotypes,  $\mathbf{a}$  contains the marker effect  
696 estimates,  $\mathbf{Z}$  contains the observed genotypes for the 33k markers,  $\mathbf{b}$  contains the OTU  
697 abundance effects,  $\mathbf{W}$  is a matrix with all 4,018 abundances in the 750 individuals, and  $\mathbf{e}$   
698 is the residual. Prior to the analyses, phenotypes, abundances, and genotypic values were  
699 standardized to mean zero and SD = 1. As priors  $\pi$  for SNPs or abundances probabilities  
700 to enter into the model, we used  $\pi \sim \text{Beta}(p_0 = 5, \pi_0 = 0.001)$ , which has expectation  $\pi_0$   
701 and variance  $\pi_0(1 - \pi_0) / (p_0 + 1)$ . We also considered a much more liberal, flat prior for  $\pi$   
702  $\sim \text{Beta}(p_0 = 2, \pi_0 = 0.01)$ , but we did not observe strong differences. A total of 50k  
703 iterations were run per Bayes C chain, a plot of the residual variances along iterations  
704 indicated convergence was attained with this number of iterations. To assess predictive  
705 accuracy, 75 (10% of N) phenotypes were randomly removed and predicted with the fitted  
706 model. Correlation between observed and predicted phenotypes was used as measure of  
707 predictive accuracy.

708

709 The ‘heritability’ is not explicitly defined in a Bayes C framework, and here we used the  
710 proposal by [58] (<https://github.com/gdlc/BGLR-R/blob/master/inst/md/heritability.md>).  
711 In short, at each iteration  $i$ , the algorithm samples SNPs and OTUs effects:

712

713  $\mathbf{u}^{(i)} = \mathbf{Z} \hat{\mathbf{a}}^{(i)}$

714  $\mathbf{v}^{(i)} = \mathbf{W} \hat{\mathbf{b}}^{(i)}$

715

716 where  $\mathbf{u}^{(i)}$  and  $\mathbf{v}^{(i)}$  are genome and microbiome effects at  $i$ -the iteration for the set of  
717 individuals, respectively,  $\hat{\mathbf{a}}^{(i)}$  and  $\hat{\mathbf{b}}^{(i)}$  are current SNP and OTU abundances solutions;  
718 therefore,  $\text{Var}(\mathbf{u}^{(i)}) / \text{Var}(\mathbf{y})$  and  $\text{Var}(\mathbf{v}^{(i)}) / \text{Var}(\mathbf{y})$  are  $i$ -th iterate heritability and  
719 microbiability estimates wherefrom posterior means can be estimated by averaging over  
720 iterations. For Bayes Cgb, we also sampled the absolute covariance between  $\mathbf{u}$  and  $\mathbf{v}$ , i.e.,  
721  $|\text{Cov}(\mathbf{u}^{(i)}, \mathbf{v}^{(i)})| / \text{Var}(\mathbf{y})$ .

722

723 To assess how likely is to identify causative OTUs, we retained the probability of a given  
724 OTU entering into the model, averaged over Gibbs sampling iterations. We run a GWAS

725 of abundances ( $\mathbf{x}_k$ ,  $k=1, N_{\text{OTU}}$ ) on SNP genotypes ( $\mathbf{z}_j$ ,  $j=1, N_{\text{SNP}}$ ) using R function  $\text{lm}(\mathbf{x}_k$   
726  $\sim \mathbf{z}_j)$  and we computed the P-value of both causative QTNs, i.e., affecting abundances,  
727 and neutral SNPs. This was done in the Recursive scenario only. In this scenario, we also  
728 computed the heritabilities of all abundance levels using GBLUP via a RKHS strategy  
729 (<https://github.com/gdlc/BGLR-R/blob/master/inst/md/GBLUP.md#RKHS>) using  
730 BGLR. Weakly informative priors for variances were used to mimic a REML-like  
731 estimator.

732

### 733 **Author contributions**

734 MPE, GDLC and LMZ conceived research. MPE and LMZ performed research. All  
735 authors discussed research. MPE wrote the manuscript with help from the rest of authors.

736

### 737 **Acknowledgments**

738 This work was developed while MPE and LMZ spent a research stay at Michigan State  
739 University kindly funded by GDLC. LMZ is supported by a Ph.D. grant from the Ministry  
740 of Economy and Science (MINECO, Spain), MPE is funded by MINECO grants  
741 AGL2016-78709-R and PID2019-108829RB-I00, from the EU through BFU2016-  
742 77236-P (MINECO/AEI/FEDER, EU) and “Centro de Excelencia Severo Ochoa 2016-  
743 2019” award SEV-2015-0533. YRC was funded by Marie Skłodowska-Curie grant (P-  
744 Sphere) agreement No 6655919 (EU).

745

### 746 **References**

- 747 1. Ruff WE, Greiling TM, Kriegel MA. Host–microbiota interactions in immune-  
748 mediated diseases [Internet]. Nature Reviews Microbiology. Nature Research;  
749 2020. pp. 521–538. doi:10.1038/s41579-020-0367-2
- 750 2. Zhang Q, Difford G, Sahana G, Løvendahl P, Lassen J, Lund MS, et al. Bayesian  
751 modelling reveals host genetics associated with rumen microbiota jointly  
752 influence methane emission in dairy cows. ISME J. 2020;14: 2019–2033.  
753 doi:10.1038/s41396-020-0663-x
- 754 3. Maltecca C, Bergamaschi M, Tiezzi F. The interaction between microbiome and  
755 pig efficiency: A review. J Anim Breed Genet. Blackwell Publishing Ltd;  
756 2020;137: 4–13. doi:10.1111/jbg.12443
- 757 4. Difford GF, Plichta DR, Løvendahl P, Lassen J, Noel SJ, Højberg O, et al. Host  
758 genetics and the rumen microbiome jointly associate with methane emissions in

- 759 dairy cows. *PLoS Genet. Public Library of Science*; 2018;14: e1007580.  
760 doi:10.1371/journal.pgen.1007580
- 761 5. Kundu P, Blacher E, Elinav E, Pettersson S. Our Gut Microbiome: The Evolving  
762 Inner Self [Internet]. *Cell. Cell Press*; 2017. pp. 1481–1493.  
763 doi:10.1016/j.cell.2017.11.024
- 764 6. Difford GF, Lassen J, Løvendahl P. Genes and microbes, the next step in dairy  
765 cattle breeding. *EAAP—67th Annual Meeting*. 2016.
- 766 7. Falconer D, Mackay T. *Introduction to Quantitative Genetics*. essex: Longman  
767 Publishing Group; 1996.
- 768 8. Zilber-Rosenberg I, Rosenberg E. Role of microorganisms in the evolution of  
769 animals and plants: the hologenome theory of evolution. *FEMS Microbiol Rev.*  
770 *Oxford Academic*; 2008;32: 723–735. doi:10.1111/j.1574-6976.2008.00123.x
- 771 9. Rothschild D, Weissbrod O, Barkan E, Kurilshikov A, Korem T, Zeevi D, et al.  
772 Environment dominates over host genetics in shaping human gut microbiota.  
773 *Nature. Nature Publishing Group*; 2018;555: 210–215. doi:10.1038/nature25973
- 774 10. Lloyd-Price J, Arze C, Ananthakrishnan AN, Schirmer M, Avila-Pacheco J, Poon  
775 TW, et al. Multi-omics of the gut microbial ecosystem in inflammatory bowel  
776 diseases. *Nature. Nature Publishing Group*; 2019;569: 655–662.  
777 doi:10.1038/s41586-019-1237-9
- 778 11. Wallace JR, Sasson G, Garnsworthy PC, Tapio I, Gregson E, Bani P, et al. A  
779 heritable subset of the core rumen microbiome dictates dairy cow productivity  
780 and emissions. *Sci Adv. American Association for the Advancement of Science*;  
781 2019;5: eaav8391. doi:10.1126/sciadv.aav8391
- 782 12. Camarinha-Silva A, Maushammer M, Wellmann R, Vital M, Preuss S,  
783 Bennewitz J. Host genome influence on gut microbial composition and microbial  
784 prediction of complex traits in pigs. *Genetics. Genetics Society of America*;  
785 2017;206: 1637–1644. doi:10.1534/genetics.117.200782
- 786 13. Khanal P, Maltecca C, Schwab C, Fix J, Tiezzi F. Microbiability of meat quality  
787 and carcass composition traits in swine. *bioRxiv. Cold Spring Harbor*  
788 *Laboratory*; 2019; 833731. doi:10.1101/833731
- 789 14. Pereyra MA, Creus CM. *Modifying the Rhizosphere of Agricultural Crops to*  
790 *Improve Yield and Sustainability: Azospirillum as a Model Rhizotroph.*  
791 *Rhizotrophs: Plant Growth Promotion to Bioremediation. Springer Singapore*;  
792 2017. pp. 15–37. doi:10.1007/978-981-10-4862-3\_2

- 793 15. Meuwissen THE, Hayes BJ, Goddard ME. Prediction of total genetic value using  
794 genome-wide dense marker maps. *Genetics*. 2001;157: 1819–1829. Available:  
795 [http://www.pubmedcentral.nih.gov/articlerender.fcgi?artid=1461589&tool=pmce](http://www.pubmedcentral.nih.gov/articlerender.fcgi?artid=1461589&tool=pmcentrez&rendertype=abstract)  
796 [ntrez&rendertype=abstract](http://www.pubmedcentral.nih.gov/articlerender.fcgi?artid=1461589&tool=pmcentrez&rendertype=abstract)
- 797 16. Crossa J, Pérez-Rodríguez P, Cuevas J, Montesinos-López O, Jarquín D, de los  
798 Campos G, et al. Genomic Selection in Plant Breeding: Methods, Models, and  
799 Perspectives [Internet]. *Trends in Plant Science*. Elsevier Current Trends; 2017.  
800 pp. 961–975. doi:10.1016/j.tplants.2017.08.011
- 801 17. Meuwissen T, Hayes B, Goddard M. Accelerating Improvement of Livestock  
802 with Genomic Selection. *Annu Rev Anim Biosci*. 2013;1: 221–237.  
803 doi:10.1146/annurev-animal-031412-103705
- 804 18. De Los Campos G, Gianola D, Allison DB. Predicting genetic predisposition in  
805 humans: The promise of whole-genome markers. *Nat Rev Genet*. Nature  
806 Publishing Group; 2010;11: 880–886. doi:10.1038/nrg2898
- 807 19. Tierney BT, He Y, Church GM, Segal E, Kostic AD, Patel CJ. The predictive  
808 power of the microbiome exceeds that of genome-wide association studies in the  
809 discrimination of complex human disease. *BioRxiv*. Cold Spring Harbor  
810 Laboratory; 2020; 2019.12.31.891978. doi:10.1101/2019.12.31.891978
- 811 20. Wang J, Chen L, Zhao N, Xu X, Xu Y, Zhu B. Of genes and microbes: solving  
812 the intricacies in host genomes. *Protein Cell*. Higher Education Press; 2018;9:  
813 446–461. doi:10.1007/s13238-018-0532-9
- 814 21. Benson AK, Kelly SA, Legge R, Ma F, Low SJ, Kim J, et al. Individuality in gut  
815 microbiota composition is a complex polygenic trait shaped by multiple  
816 environmental and host genetic factors. *Proc Natl Acad Sci U S A*. National  
817 Academy of Sciences; 2010;107: 18933–18938. doi:10.1073/pnas.1007028107
- 818 22. Goodrich JK, Davenport ER, Clark AG, Ley RE. The Relationship Between the  
819 Human Genome and Microbiome Comes into View. *Annu Rev Genet*. Annual  
820 Reviews; 2017;51: 413–433. doi:10.1146/annurev-genet-110711-155532
- 821 23. Blekhman R, Goodrich JK, Huang K, Sun Q, Bukowski R, Bell JT, et al. Host  
822 genetic variation impacts microbiome composition across human body sites.  
823 *Genome Biol*. BioMed Central Ltd.; 2015;16: 191. doi:10.1186/s13059-015-  
824 0759-1
- 825 24. Crespo-Piazuelo D, Migura-Garcia L, Estellé J, Criado-Mesas L, Revilla M,  
826 Castelló A, et al. Association between the pig genome and its gut microbiota

- 827 composition. *Sci Rep. Nature Publishing Group*; 2019;9: 8791.  
828 doi:10.1038/s41598-019-45066-6
- 829 25. Ramayo-Caldas Y, Zingaretti L, Popova M, Estellé J, Bernard A, Pons N, et al.  
830 Identification of rumen microbial biomarkers linked to methane emission in  
831 Holstein dairy cows. *J Anim Breed Genet.* 2019; 49–59. doi:10.1111/jbg.12427
- 832 26. Ramayo-Caldas Y, Prenafeta-Boldú F, Zingaretti LM, Gonzalez-Rodriguez O,  
833 Dalmau A, Quintanilla R, et al. Gut eukaryotic communities in pigs: diversity,  
834 composition and host genetics contribution. *Anim Microbiome. BioMed Central*;  
835 2020;2: 18. doi:10.1186/s42523-020-00038-4
- 836 27. Weissbrod O, Rothschild D, Barkan E, Segal E. Host genetics and microbiome  
837 associations through the lens of genome wide association studies. *Current*  
838 *Opinion in Microbiology.* Elsevier Ltd; 2018. pp. 9–19.  
839 doi:10.1016/j.mib.2018.05.003
- 840 28. Bäckhed F, Roswall J, Peng Y, Feng Q, Jia H, Kovatcheva-Datchary P, et al.  
841 Dynamics and stabilization of the human gut microbiome during the first year of  
842 life. *Cell Host Microbe. Cell Press*; 2015;17: 690–703.  
843 doi:10.1016/j.chom.2015.04.004
- 844 29. Jakobsson HE, Abrahamsson TR, Jenmalm MC, Harris K, Quince C, Jernberg C,  
845 et al. Decreased gut microbiota diversity, delayed Bacteroidetes colonisation and  
846 reduced Th1 responses in infants delivered by Caesarean section. *Gut. BMJ*  
847 *Publishing Group*; 2014;63: 559–566. doi:10.1136/gutjnl-2012-303249
- 848 30. Furman O, Shenhav L, Sasson G, Kokou F, Honig H, Jacoby S, et al.  
849 Stochasticity constrained by deterministic effects of diet and age drive rumen  
850 microbiome assembly dynamics. *Nat Commun. Nature Research*; 2020;11: 1–13.  
851 doi:10.1038/s41467-020-15652-8
- 852 31. Gamazon ER, Segrè A V., Van De Bunt M, Wen X, Xi HS, Hormozdiari F, et al.  
853 Using an atlas of gene regulation across 44 human tissues to inform complex  
854 disease- and trait-associated variation. *Nat Genet. Nature Publishing Group*;  
855 2018;50: 956–967. doi:10.1038/s41588-018-0154-4
- 856 32. Hormozdiari F, van de Bunt M, Segrè A V., Li X, Joo JWJ, Bilow M, et al.  
857 Colocalization of GWAS and eQTL Signals Detects Target Genes. *Am J Hum*  
858 *Genet. Cell Press*; 2016;99: 1245–1260. doi:10.1016/j.ajhg.2016.10.003
- 859 33. Gloor GB, Macklaim JM, Pawlowsky-Glahn V, Egozcue JJ. Microbiome  
860 Datasets Are Compositional: And This Is Not Optional. *Front Microbiol.*



- 861 Frontiers; 2017;8: 2224. doi:10.3389/fmicb.2017.02224
- 862 34. Weiss S, Xu ZZ, Peddada S, Amir A, Bittinger K, Gonzalez A, et al.  
863 Normalization and microbial differential abundance strategies depend upon data  
864 characteristics. *Microbiome*. BioMed Central; 2017;5: 27. doi:10.1186/s40168-  
865 017-0237-y
- 866 35. Maltecca C, Lu D, Schillebeeckx C, McNulty NP, Schwab C, Shull C, et al.  
867 Predicting Growth and Carcass Traits in Swine Using Microbiome Data and  
868 Machine Learning Algorithms. *Sci Rep*. Nature Publishing Group; 2019;9: 1–15.  
869 doi:10.1038/s41598-019-43031-x
- 870 36. Power RA, Parkhill J, De Oliviera T. Microbial Genome-Wide Association  
871 Studies: Lessons from Human GWAS. doi:10.1101/093211
- 872 37. Roehe R, Dewhurst RJ, Duthie CA, Rooke JA, McKain N, Ross DW, et al.  
873 Bovine Host Genetic Variation Influences Rumen Microbial Methane Production  
874 with Best Selection Criterion for Low Methane Emitting and Efficiently Feed  
875 Converting Hosts Based on Metagenomic Gene Abundance. Leeb T, editor.  
876 *PLoS Genet*. 2016;12: e1005846. doi:10.1371/journal.pgen.1005846
- 877 38. Huws SA, Creevey CJ, Oyama LB, Mizrahi I, Denman SE, Popova M, et al.  
878 Addressing global ruminant agricultural challenges through understanding the  
879 rumen microbiome: Past, present, and future. *Frontiers in Microbiology*.  
880 Frontiers Media S.A.; 2018. p. 2161. doi:10.3389/fmicb.2018.02161
- 881 39. Wallace RJ, Rooke JA, McKain N, Duthie CA, Hyslop JJ, Ross DW, et al. The  
882 rumen microbial metagenome associated with high methane production in cattle.  
883 *BMC Genomics*. BioMed Central Ltd.; 2015;16: 839. doi:10.1186/s12864-015-  
884 2032-0
- 885 40. VanRaden PM. Efficient methods to compute genomic predictions. *J Dairy Sci*.  
886 Elsevier; 2008;91: 4414–4423. doi:10.3168/jds.2007-0980
- 887 41. Ross EM, Moate PJ, Maret LC, Cocks BG, Hayes BJ. Metagenomic predictions:  
888 from microbiome to complex health and environmental phenotypes in humans  
889 and cattle. White BA, editor. *PLoS One*. Public Library of Science; 2013;8:  
890 e73056. doi:10.1371/journal.pone.0073056
- 891 42. Saborío-Montero A, Gutiérrez-Rivas M, García-Rodríguez A, Atxaerandio R,  
892 Goiri I, López de Maturana E, et al. Structural equation models to disentangle the  
893 biological relationship between microbiota and complex traits: Methane  
894 production in dairy cattle as a case of study. *J Anim Breed Genet*. Blackwell

- 895 Publishing Ltd; 2020;137: 36–48. doi:10.1111/jbg.12444
- 896 43. Muñoz PR, Resende MFR, Gezan SA, Resende MDV, de los Campos G, Kirst  
897 M, et al. Unraveling additive from nonadditive effects using genomic relationship  
898 matrices. *Genetics*. Genetics Society of America; 2014;198: 1759–1768.  
899 doi:10.1534/genetics.114.171322
- 900 44. Cole NA. Effects of animal-to-animal exchange of ruminal contents on the feed  
901 intake and ruminal characteristics of fed and fasted lambs. *J Anim Sci*. Oxford  
902 Academic; 1991;69: 1795. doi:10.2527/1991.6941795x
- 903 45. Weimer PJ. Redundancy, resilience, and host specificity of the ruminal  
904 microbiota: Implications for engineering improved ruminal fermentations.  
905 *Frontiers in Microbiology*. Frontiers Media S.A.; 2015. p. 296.  
906 doi:10.3389/fmicb.2015.00296
- 907 46. Dill-Mcfarland KA, Breaker JD, Suen G. Microbial succession in the  
908 gastrointestinal tract of dairy cows from 2 weeks to first lactation. *Sci Rep*.  
909 Nature Publishing Group; 2017;7: 1–12. doi:10.1038/srep40864
- 910 47. Crow J, Kimura M. *An Introduction to Population Genetics Theory*. The  
911 Blackburn Press; 1970.
- 912 48. Peng B, Kimmel M. simuPOP: A forward-time population genetics simulation  
913 environment. *Bioinformatics*. 2005;21: 3686–3687.  
914 doi:10.1093/bioinformatics/bti584
- 915 49. Messer PW. SLiM: simulating evolution with selection and linkage. *Genetics*.  
916 2013;194: 1037–1039. doi:10.1534/genetics.113.152181
- 917 50. Yang J, Lee SH, Goddard ME, Visscher PM. GCTA: a tool for genome-wide  
918 complex trait analysis. *Am J Hum Genet*. The American Society of Human  
919 Genetics; 2011;88: 76–82. doi:10.1016/j.ajhg.2010.11.011
- 920 51. Pérez-Enciso M, Ramírez-Ayala LC, Zingaretti LM. SeqBreed: A python tool to  
921 evaluate genomic prediction in complex scenarios. *Genet Sel Evol*. BioMed  
922 Central Ltd.; 2020;52. doi:10.1186/s12711-020-0530-2
- 923 52. Barton NH, Etheridge AM, Véber A. The infinitesimal model: Definition,  
924 derivation, and implications. *Theor Popul Biol*. Elsevier Inc.; 2017;118: 50–73.  
925 doi:10.1016/j.tpb.2017.06.001
- 926 53. Daetwyler HD, Pong-Wong R, Villanueva B, Woolliams JA. The impact of  
927 genetic architecture on genome-wide evaluation methods. *Genetics*. 2010;185:  
928 1021–1031. doi:10.1534/genetics.110.116855



- 929 54. Eyre-Walker A, Keightley PD. The distribution of fitness effects of new  
930 mutations. *Nat Rev Genet.* 2007;8: 610–618. doi:10.1038/nrg2146
- 931 55. Barton NH, Keightley PD. Understanding Quantitative Genetic Variation. *Nat*  
932 *Rev Genet.* 2002;3: 11–21. doi:10.1038/nrg700
- 933 56. Caballero A, Tenesa A, Keightley PD. The nature of genetic variation for  
934 complex traits revealed by GWAS and Regional Heritability Mapping analyses.  
935 *Genetics.* 2015;201: 1601–1613.
- 936 57. Pérez-Enciso M, Forneris N, de Los Campos G, Legarra A. Evaluating Sequence-  
937 Based Genomic Prediction with an Efficient New Simulator. *Genetics.* *Genetics*;  
938 2017;205: 939–953. doi:10.1534/genetics.116.194878
- 939 58. Pérez P, de Los Campos G. Genome-Wide Regression & Prediction with the  
940 BGLR Statistical Package. *Genetics.* 2014;198: 483–95.  
941 doi:10.1534/genetics.114.164442  
942
